# Supplementary material
Source: MDPI journal article supplement (https://www.mdpi.com/2073-4433/13/8/1233)
Supplement: s1 [file s1]

# Supplementary Materials: Development of Two-Dimensional Visibility Estimation Model Using Machine Learning: Preliminary Results for South Korea

Wonei Choi, Junsung Park, Daewon Kim, Jeonghyun Park, Serin Kim and Hanlim Lee \*

Major of Spatial Information Engineering, Division of Earth Environmental System Science, Pukyong National University, Busan 48513, Korea; cwyh3338@pukyong.ac.kr (W.C.); junsung@pukyong.ac.kr (J.P.); daewon@pukyong.ac.kr (D.K.); bjh48312@pukyong.ac.kr (J.P.); 201713413@pukyong.ac.kr (S.K.)

\* Correspondence: hllee@pknu.ac.kr; Tel.: +82-051-629-6688

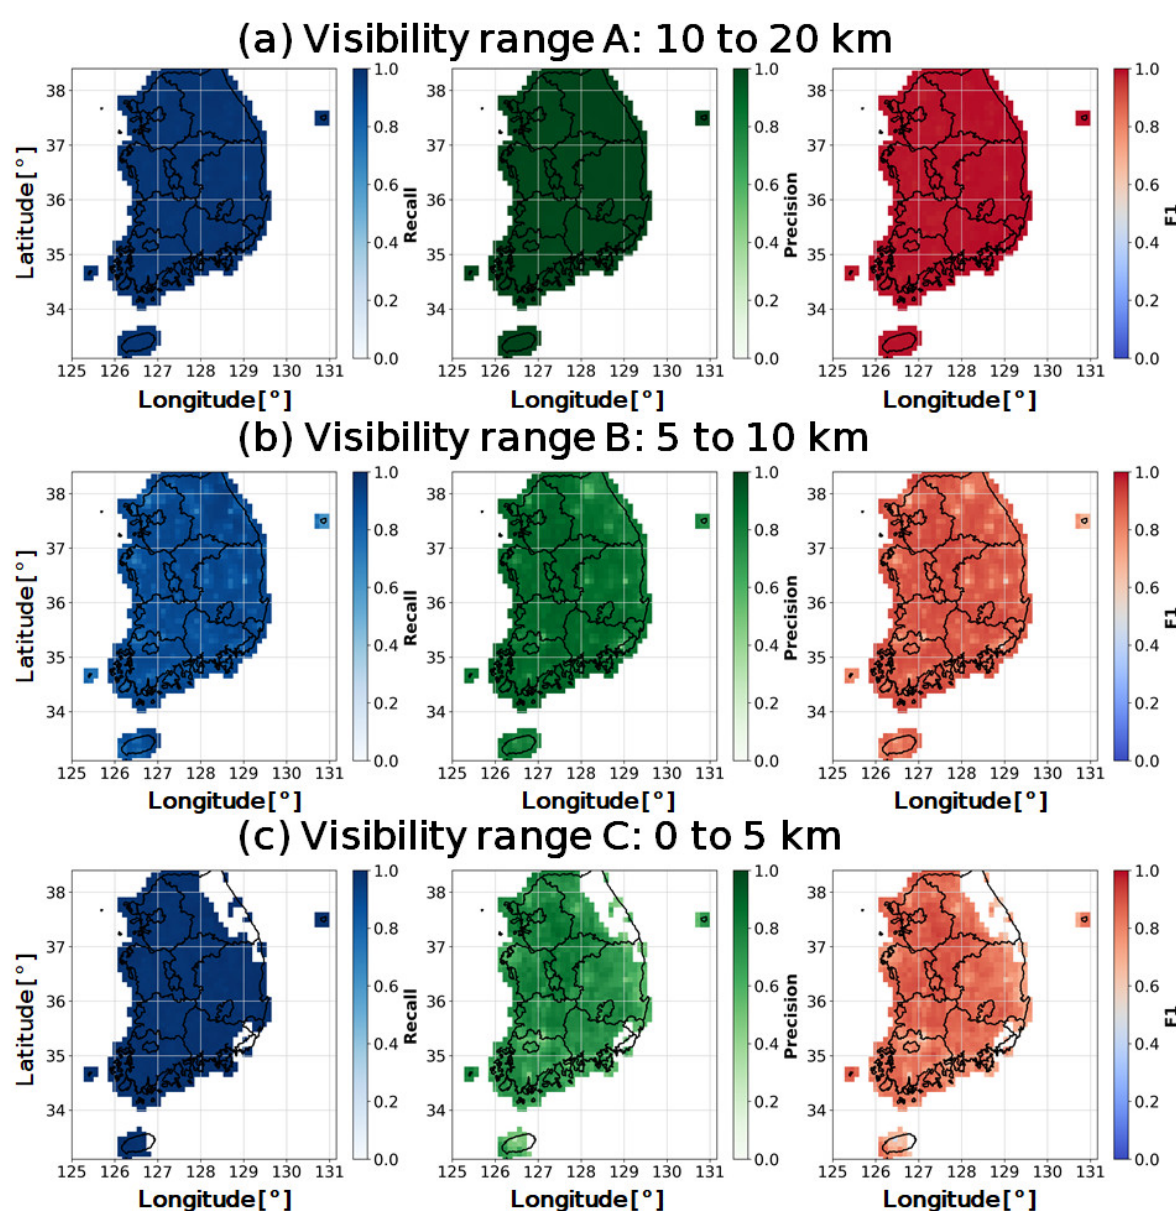

**Figure S1.** Recall, Precision, and F1 score of visibility estimation models in South Korea for three visibility ranges ((a) 0 to 5 km, (b) 5 to 10 km, and (c) 10 to 20 km) for the training set.

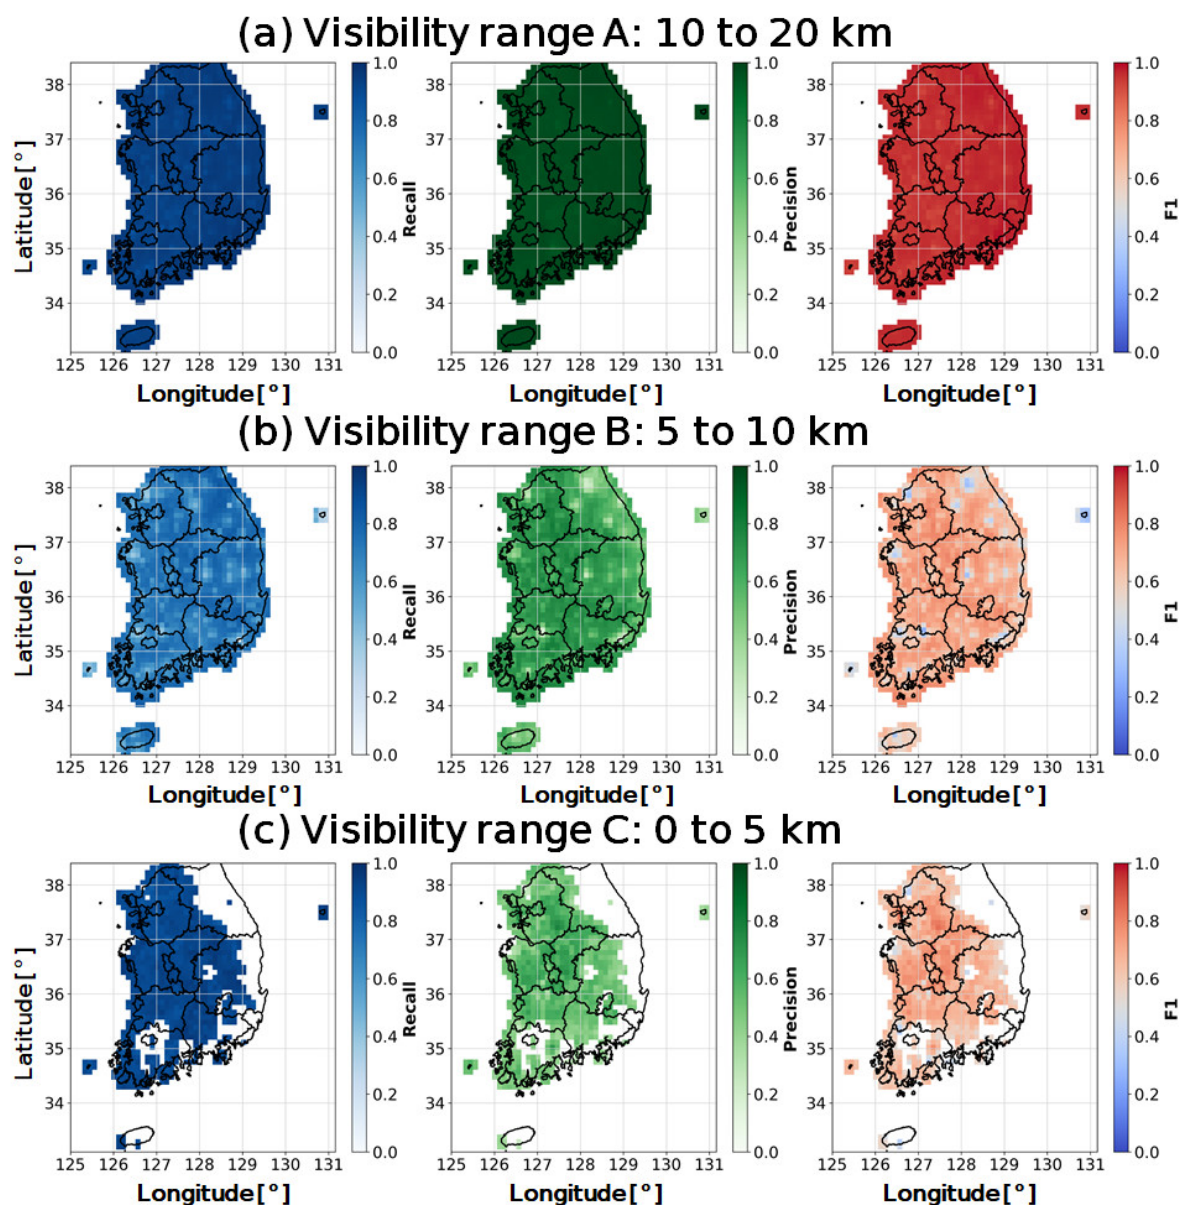

**Figure S2.** Recall, Precision, and F1 score of visibility estimation models in South Korea for three visibility ranges ((a) 0 to 5 km, (b) 5 to 10 km, and (c) 10 to 20 km) for the validation set.
